# Supplementary material
Source: PubMed Central journal article supplement (PMC1764586)
Supplement: cmaj_176_1_41__1.pdf [file cmaj_176_1_41__1.pdf]

## Appendix 1. Contribution disclosure and authorship forms used in the study

### First mailing: Forms to be filled out by the corresponding author

Dear corresponding author,

After receiving your manuscript for publication in the *Croatian Medical Journal* (CMJ), we ask you to kindly fill out and sign a copy of this form for each of the authors on the byline, as indicated by the byline number below. The signature will evidence the mutual understanding between the CMJ and the undersigned author on the rights and responsibilities of both parties in the evaluation process of the work and its eventual publication in the CMJ.

#### AUTHORSHIP STATEMENT FORM

|                             |                        |
|-----------------------------|------------------------|
| <i>Title of manuscript:</i> | <i>Manuscript No.:</i> |
| <i>Name of coauthor:</i>    | <i>No. on byline:</i>  |

**1. Authorship and contributions to authorship.** We ask authors to specify their individual contributions, following the authorship rules of the *Uniform Requirements for Manuscripts Submitted to Medical Journals*, which state that authorship credit should be based only on a substantial contribution to (1) study conception and design, data acquisition, or data analysis and interpretation; (2) drafting the article or revising it critically for important intellectual content; and (3) final approval of the version to be published.

In the spaces marked "Contribution Codes," those code letters from the box should be marked that designate substantive contribution(s) of individual authors to the paper. Any contribution not described in the box should be indicated in the space for "Other" contributions.

#### Contribution Codes

- Conception and design
- Analysis and interpretation of the data
- Provision of study materials or patients
- Collection, assembly and possession of raw data
- Statistical expertise
- Drafting of the article
- Critical revision of the article for important intellectual content
- Final approval of the article
- Obtaining of funding
- Administrative, technical, or logistic support
- Guarantor of the study
- Other (*specify*): \_\_\_\_\_

**Signature of corresponding author:** \_\_\_\_\_ **Date:** \_\_\_\_\_

*Institution and address:* \_\_\_\_\_

*Phone:* \_\_\_\_\_ *Fax:* \_\_\_\_\_

*Email:* \_\_\_\_\_

**2. Copyright transfer.** The corresponding author warrants that they are the authors and sole owners of the submitted manuscript. The author also warrant that the work is original; that it has not been previously published in print or electronic format and is not under consideration by another publisher or electronic medium; that it has not been previously transferred, assigned, or otherwise encumbered; and that the authors have full power to grant such rights. With respect to the results of this work, the manuscript of this or substantially similar content will not be submitted to any other journal until the review process in the CMJ has been officially completed (acceptance or rejection of the manuscript).

The paper will not be withdrawn from the review process by the CMJ Editorial Board until the review process is completed. The authors will comply with the requests of the CMJ editors and reviewers to improve the paper for publication. The unavoidable disagreements will be submitted in a written form; the authors are aware that disagreement(s) with the CMJ's requests may result in the rejection of the manuscript. The authors hereby grant to the CMJ the right to edit, revise, abridge, and condense the manuscript.

If the manuscript is accepted for publication in the CMJ, the authors hereby transfer the copyright of the paper to the CMJ. The authors permit the CMJ to allow third parties to copy any part of the journal without asking for permission, provided that reference to the source is given.

For papers with more than one author: I agree to allow the corresponding author to make decisions about prepublication release of information in the paper to the media, federal agencies, or both.

**Signature of**

**corresponding author:** \_\_\_\_\_ **Date:** \_\_\_\_\_

**3. Financial disclosure.** Please check the appropriate box or boxes below:

I certify that all financial and material support for this research and work are clearly identified in the manuscript.

I certify that all affiliations of authors with or financial involvement (e.g., employment, consultancies, honoraria, expert testimony, stock ownership or options, grants or patents received or pending, royalties) with any organization or entity with a financial interest in or financial conflict with the subject or materials discussed in the manuscript are disclosed completely here:

\_\_\_\_\_  
\_\_\_\_\_

or are disclosed  in an attachment.

I have no relevant financial interests in this manuscript.

**Signature of**

**corresponding author:** \_\_\_\_\_ **Date:** \_\_\_\_\_

**4. Acknowledgement statement.** The corresponding author must sign the following statement:

All persons who have made substantial contributions to the preparation of the manuscript, but who are not authors, are named in the Acknowledgements section. No contributor has been omitted.

**Signature of**

**corresponding author:** \_\_\_\_\_ **Date:** \_\_\_\_\_

**5. Editorial research.** We are keen to better understand and improve editorial conduct, decision-making, and issues related to peer review. Therefore, we occasionally conduct or take part in editorial research, and your submitted paper might be used in such research. If you do not want your paper entered into such a study, please let us know in a separate letter.

Your decision to take part or not will have no effect on the editorial decision on your paper.

**Please sign and return to: CMJ, Zagreb University School of Medicine,  
Salata 3,10000 Zagreb, Croatia (phone/fax +385 1 4590 222)**

**Second mailing: Form to be filled out by each individual author**

Dear corresponding author,

After receiving your manuscript for publication in the *Croatian Medical Journal (CMJ)*, we ask you to kindly fill out and sign a copy of this form. **Each coauthor should sign a separate copy.** The signature will evidence the mutual understanding between the CMJ and the undersigned author on the rights and responsibilities of both parties in the evaluation process of the work and its eventual publication in the CMJ.

**AUTHORSHIP STATEMENT FORM**

|                             |                        |
|-----------------------------|------------------------|
| <i>Title of manuscript:</i> | <i>Manuscript No.:</i> |
| <i>Name of author:</i>      | <i>No. on byline:</i>  |

**1. Authorship and contributions to authorship.** We ask authors to specify their individual contributions, following the authorship rules of the *Uniform Requirements for Manuscripts Submitted to Medical Journals*, which state that authorship credit should be based only on a substantial contribution to (1) study conception and design, data acquisition, or data analysis and interpretation; (2) drafting the article or revising it critically for important intellectual content; and (3) final approval of the version to be published.

In the boxes below, check off any and all of your substantive contribution(s) to this manuscript. Any contributions of yours that are not categorized below should be indicated in the space for "Other" contributions.

**Contribution Codes**

- Conception and design
- Analysis and interpretation of the data
- Provision of study materials or patients
- Collection, assembly and possession of raw data
- Statistical expertise
- Drafting of the article
- Critical revision of the article for important intellectual content
- Final approval of the article
- Obtaining of funding
- Administrative, technical, or logistic support
- Guarantor of the study
- Other (*specify*): \_\_\_\_\_

**Author's signature:** \_\_\_\_\_ **Date:** \_\_\_\_\_

*Institution and address:* \_\_\_\_\_

*Phone:* \_\_\_\_\_ *Fax:* \_\_\_\_\_

*Email:* \_\_\_\_\_

**2. Copyright transfer.** The listed authors warrant that they are the authors and sole owners of the submitted manuscript. The authors also warrant that the work is original; that it has not been previously published in print or electronic format and is not under consideration by another publisher or electronic medium; that it has not been previously transferred, assigned, or otherwise encumbered; and that the authors have full power to grant such rights. With respect to the results of this work, the manuscript of this or substantially similar content will not be submitted to any other journal until the review process in the CMJ has been officially completed (acceptance or rejection of the manuscript).

The paper will not be withdrawn from the review process by the CMJ Editorial Board until the review process is completed. The authors will comply with the requests of the CMJ editors and reviewers to improve the paper for publication. The unavoidable disagreements will be submitted in a written form; the authors are aware that disagreement(s) with the CMJ's requests may result in the rejection of the manuscript. The authors hereby grant to the CMJ the right to edit, revise, abridge, and condense the manuscript.

If the manuscript is accepted for publication in the CMJ, the authors hereby transfer the copyright of the paper to the CMJ. The authors permit the CMJ to allow third parties to copy any part of the journal without asking for permission, provided that reference to the source is given.

**For papers with more than one author:** I agree to allow the corresponding author to make decisions about prepublication release of information in the paper to the media, federal agencies, or both.

**Author's signature:** \_\_\_\_\_ **Date:** \_\_\_\_\_

**3. Financial disclosure.** Please check the appropriate box or boxes below:

I certify that all financial and material support for this research and work are clearly identified in the manuscript.

I certify that all affiliations of authors with or financial involvement (e.g., employment, consultancies, honoraria, expert testimony, stock ownership or options, grants or patents received or pending, royalties) with any organization or entity with a financial interest in or financial conflict with the subject or materials discussed in the manuscript are disclosed completely here:

\_\_\_\_\_  
\_\_\_\_\_  
\_\_\_\_\_

or are disclosed  in an attachment.

I have no relevant financial interests in this manuscript.

**Author's signature:** \_\_\_\_\_ **Date:** \_\_\_\_\_

**4. Acknowledgement statement.** The corresponding author must sign the following statement:

All persons who have made substantial contributions to the preparation of the manuscript, but who are not authors, are named in the Acknowledgements section. No contributor has been omitted.

**Signature of**

**corresponding author:** \_\_\_\_\_ **Date:** \_\_\_\_\_

**5. Editorial research.** We are keen to better understand and improve editorial conduct, decision-making, and issues related to peer review. Therefore, we occasionally conduct or take part in editorial research, and your submitted paper might be used in such research. If you do not want your paper entered into such a study, please let us know in a separate letter.

Your decision to take part or not will have no effect on the editorial decision on your paper.

**Please sign and return to: CMJ, Zagreb University School of Medicine,  
Salata 3, 10000 Zagreb, Croatia (phone/fax +385 1 4590 222)**
